# Supplementary material for: UV-Assisted 3D Printing of Glass and Carbon Fiber-Reinforced Dual-Cure Polymer Composites
Source: Materials (Basel). 2016 Jul 16;9(7):583. doi: 10.3390/ma9070583 (PMC5456860; doi:10.3390/ma9070583)
Supplement: Supplementary file 1 [file materials-09-00583-s001.pdf]

# Supplementary Materials: UV-Assisted 3D Printing of Glass and Carbon Fiber-Reinforced Dual-Cure Polymer Composites

Marta Invernizzi, Gabriele Natale, Marinella Levi, Stefano Turri and Gianmarco Griffini

The viscosity curves of all formulations investigated in this work were fitted by the power-law equation (Equation (1) in the main manuscript). The calculated values of the consistency index  $K$  and power-law index  $n$  are shown in Tables S1 and S2 and the consistency index  $K$  is plotted as a function of  $\text{SiO}_2$  concentration in the blends in Figures S1 and S2.

**Table S1.** Values of the power-law index  $n$  and of the consistency index  $K$  for B33 formulations (dual-cure blend containing 33 wt. % of photocurable acrylic component).

| SiO <sub>2</sub> wt. % in the Blend | $K$    | $n$  |
|-------------------------------------|--------|------|
| 0 (B33)                             | 22.31  | 0.99 |
| 3                                   | 20.56  | 0.76 |
| 5                                   | 158.15 | 0.43 |
| 7                                   | 795.26 | 0.11 |

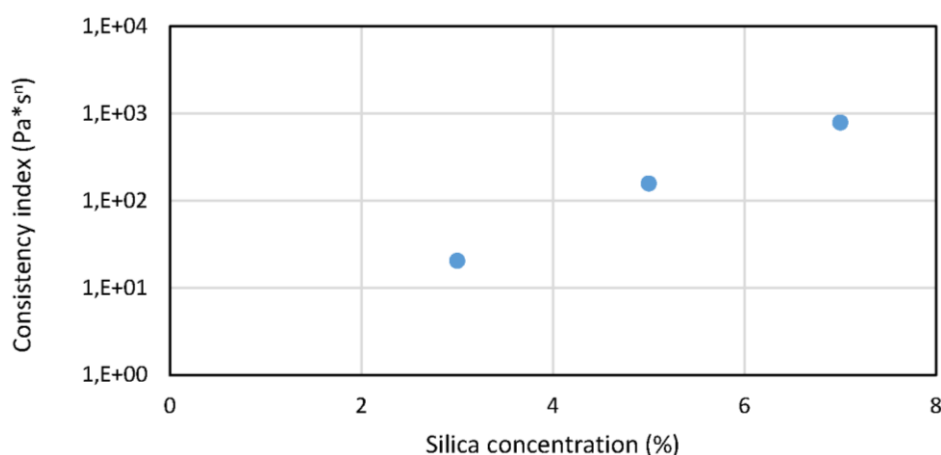

**Figure S1.** Consistency indexes  $K$  as a function of  $\text{SiO}_2$  concentration for B33 formulations (dual-cure blend containing 33 wt. % of photocurable acrylic component).

**Table S2.** Values of the power-law index  $n$  and of the consistency index  $K$  for unfilled (B33 and B50) and CFR (B50C5) composite formulations. For comparison, CFR and GFR composite formulations without the addition of  $\text{SiO}_2$  are also presented (B50C5-no $\text{SiO}_2$  and B33G5-no $\text{SiO}_2$ , respectively).

| SiO <sub>2</sub> wt. % in the Blend | $K$    | $n$  |
|-------------------------------------|--------|------|
| B33                                 | 919.16 | 0.14 |
| B50                                 | 996.51 | 0.12 |
| B50C5                               | 803.33 | 0.20 |
| B33G5-noSiO <sub>2</sub>            | 4.67   | 0.97 |
| B50C5-noSiO <sub>2</sub>            | 3.46   | 1.00 |

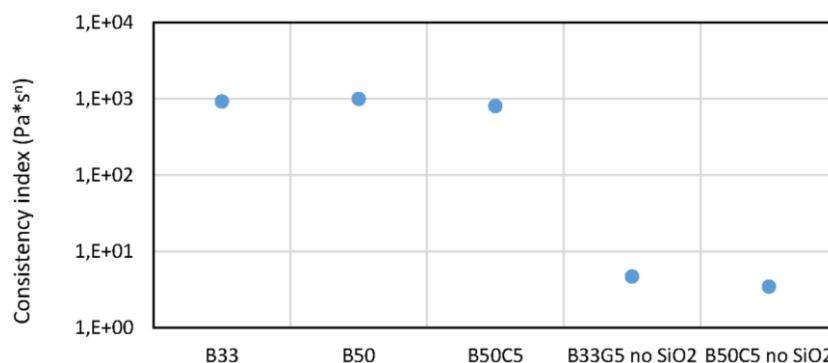

**Figure S2.** Consistency indexes  $K$  as a function of SiO<sub>2</sub> concentration for unfilled (B33 and B50) and CFR (B50C5) composite formulations. For comparison, CFR and GFR composite formulations without the addition of SiO<sub>2</sub> are also presented (B50C5-noSiO<sub>2</sub> and B33G5-noSiO<sub>2</sub>, respectively).

A low-cost home-assembled 3Drag 1.2 benchtop printer (Futura Elettronica, Italy) incorporating a syringe dispenser with a 0.84 mm diameter nozzle was equipped with two 3W UV-A torches (WF-501B by Ultrafire Ltd., Shenzhen, China) on the printing head with light emission peaked at 405 nm (Figure S3).

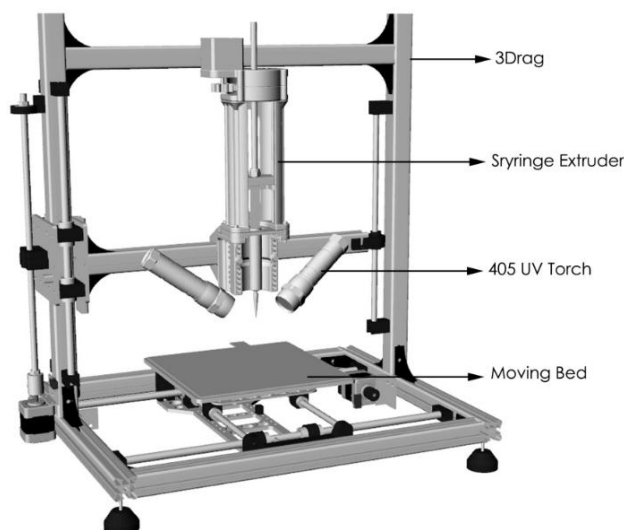

**Figure S3.** Schematic representation of the 3D printer equipped with UV-torches used in this work.

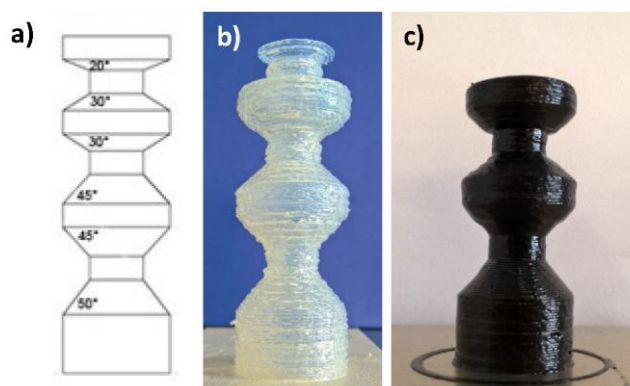

**Figure S4.** 3D digital model (a) and UV-3D printed reproductions of the object used to demonstrate the printability of the GFR (b) and CFR (c) composite formulations developed in this work.

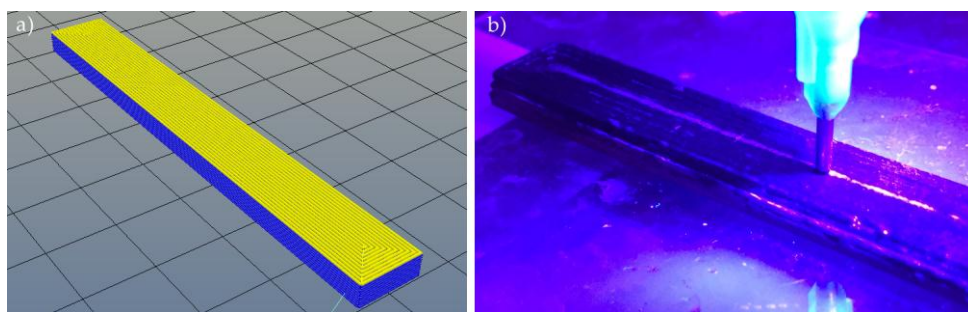

**Figure S5.** (a) 3D slicing model of a representative specimen (obtained using Cura, Ultimaker B.V.) and (b) detail of the UV-3D printing process of a CFR formulation.
